# Supplementary material for: Pulmonary Capillary Wedge Pressure during Exercise Is Prognostic for Long-Term Survival in Patients with Symptomatic Heart Failure
Source: MDPI journal article supplement (doi:10.3390/jcm11195901), 2022-10-06
Supplement: s1 [file s1]

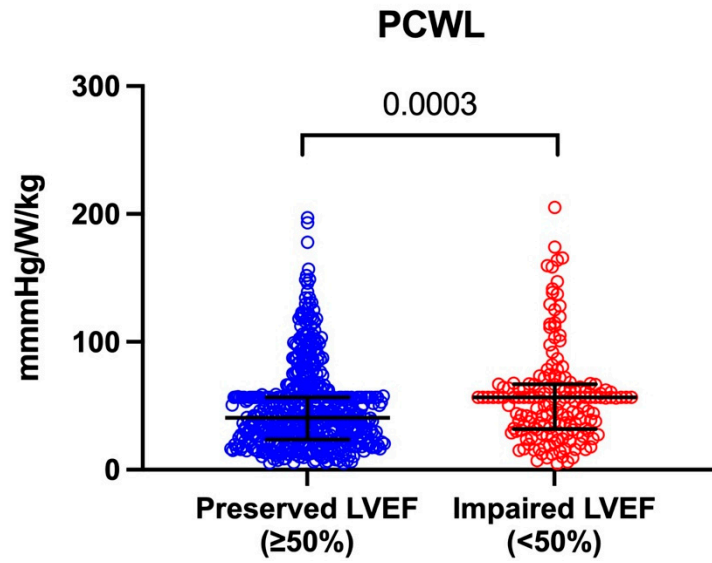

**Figure S1: Pulmonary capillary wedge pressures during exercise in patients with preserved and impaired left-ventricular ejection fraction.** Pulmonary capillary wedge pressures during exercise, expressed as peak exercise to workload normalized to body weight (PCWL), is higher in patients with impaired left-ventricular ejection fraction <50% (in red) as opposed to patients with preserved systolic function (in blue).
